# Supplementary material
Source: Research Square preprint supplement (doi:10.21203/rs.3.rs-10011613/v1)
Supplement: Supplementary file 1 [file 18b8cf42cf154862fa226c15.pdf]

# Supplementary Material

Figure S1. Algorithm for participant selection in the NHANES (1999-2018).

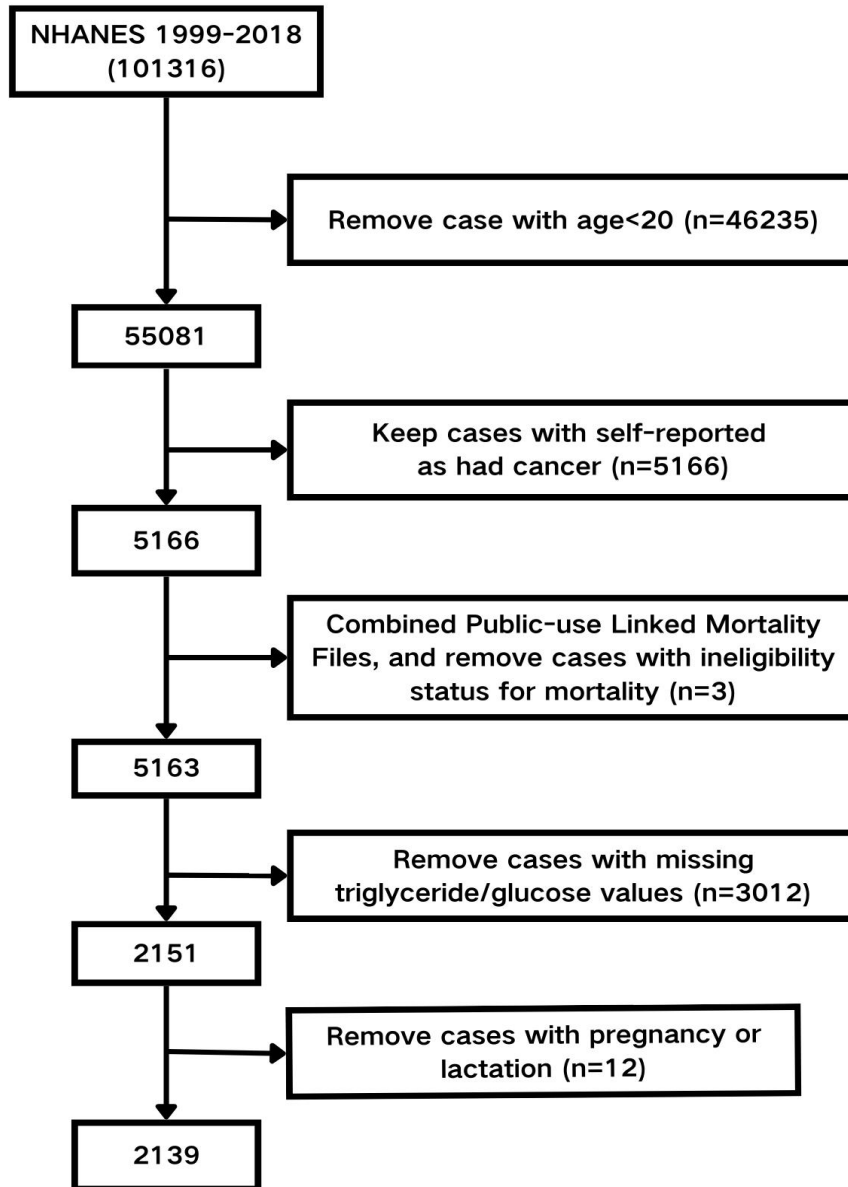

**Table S1. Missing value information of variables**

| <b>Variable</b> | <b>N</b> | <b>Percent(%)</b> | <b>Total</b> |
|-----------------|----------|-------------------|--------------|
| Age             | 0        | 0                 | 2139         |
| Gender          | 0        | 0                 | 2139         |
| Race            | 0        | 0                 | 2139         |
| Education       | 3        | 0.14              | 2139         |
| Marital         | 11       | 0.51              | 2139         |
| PIR             | 185      | 8.65              | 2139         |
| BMI             | 46       | 2.15              | 2139         |
| Smoke           | 3        | 0.14              | 2139         |
| Drink           | 300      | 14.03             | 2139         |
| DM              | 0        | 0                 | 2139         |
| Hypertension    | 0        | 0                 | 2139         |
| Hyperlipidemia  | 0        | 0                 | 2139         |
| CVD             | 0        | 0                 | 2139         |
| Cancer sites    | 1        | 0.05              | 2139         |

**Figure S2. Distribution of BMI before and after multiple imputation**

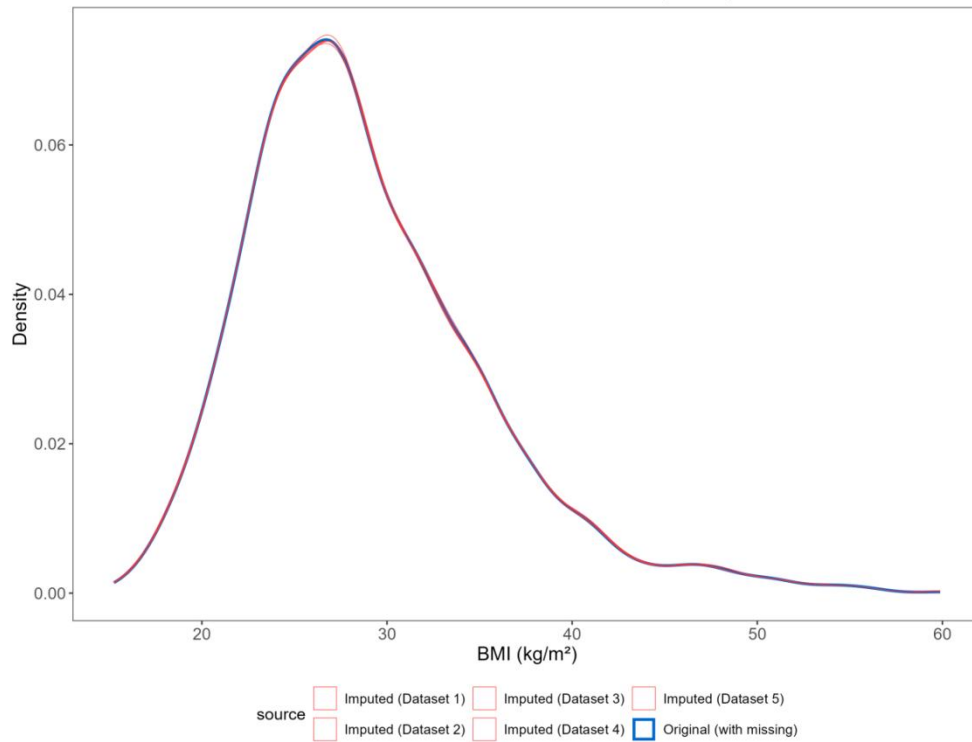

**Table S2. Comparison of Distribution and Statistical Characteristics of BMI Between Imputed and Original Datasets**

| Imputed Dataset | KS Statistic | KS Test P-value | Original Mean | Imputed Mean | Relative Difference in Mean (%) | Original Std. Dev. | Imputed Std. Dev. | Relative Difference in Std. Dev. (%) | t-test P-value |
|-----------------|--------------|-----------------|---------------|--------------|---------------------------------|--------------------|-------------------|--------------------------------------|----------------|
| 1               | 0.0021       | 1.000           | 28.8298       | 28.8229      | -0.0240                         | 6.4394             | 6.4365            | -0.0460                              | 0.9424         |
| 2               | 0.0017       | 1.000           | 28.8298       | 28.8187      | -0.0386                         | 6.4394             | 6.4480            | 0.1326                               | 0.9253         |
| 3               | 0.0032       | 1.000           | 28.8298       | 28.8437      | 0.0483                          | 6.4394             | 6.4584            | 0.2944                               | 0.9724         |
| 4               | 0.0032       | 1.000           | 28.8298       | 28.8813      | 0.1788                          | 6.4394             | 6.4934            | 0.8382                               | 0.8207         |
| 5               | 0.0026       | 1.000           | 28.8298       | 28.8149      | -0.0518                         | 6.4394             | 6.4091            | -0.4703                              | 0.9095         |
| Average         | -            | -               | 28.8298       | 28.8333      | 0.0225                          | 6.4394             | 6.4491            | 0.1498                               | -              |

**Figure S3. Distribution of PIR before and after multiple imputation**

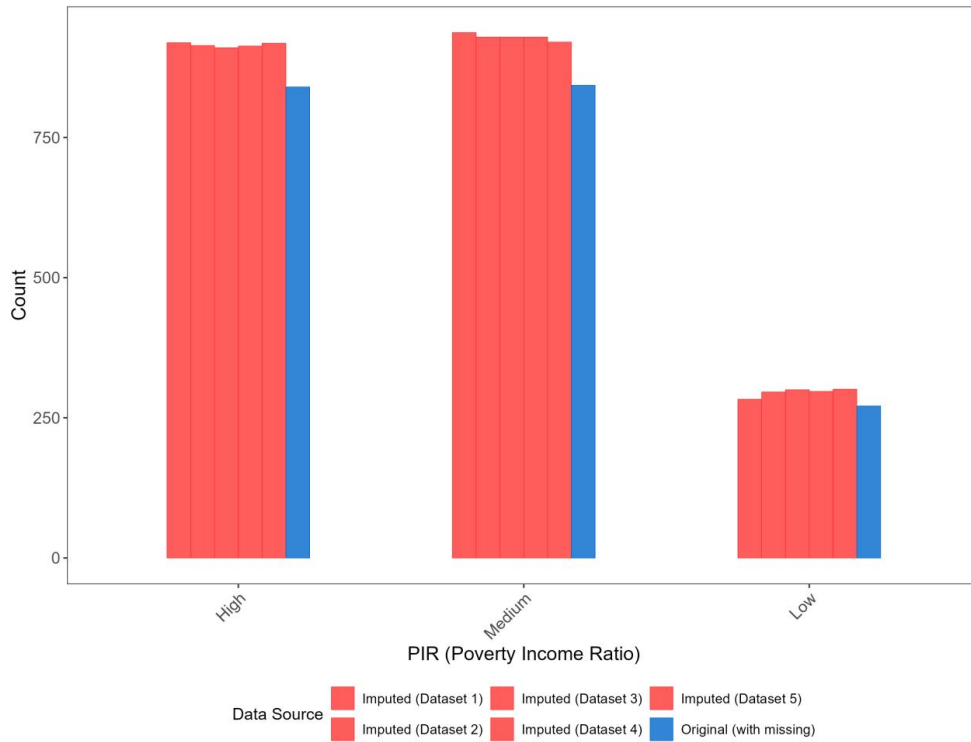

**Table S3. Comparison of Frequency, Proportion and Distribution Consistency of PIR Categories Between Original and Multiple Imputed Datasets**

| PIR    | Original Frequency | Original Proportion (%) | Mean Imputed Frequency | Mean Imputed Proportion (%) | Absolute Difference in Frequency | Relative Difference in Proportion (%) | Imputed Dataset | Chi-square Statistic $\chi^2$ | P-value |
|--------|--------------------|-------------------------|------------------------|-----------------------------|----------------------------------|---------------------------------------|-----------------|-------------------------------|---------|
| High   | 840                | 42.99                   | 914.8                  | 42.77                       | 74.8                             | -0.51                                 | 1               | 0.4110                        | 0.8142  |
| Medium | 843                | 43.14                   | 928.8                  | 43.42                       | 85.8                             | 0.65                                  | 2               | 0.0364                        | 0.9820  |
| Low    | 271                | 13.87                   | 295.4                  | 13.81                       | 24.4                             | -0.42                                 | 3               | 0.0850                        | 0.9584  |
| Total  | 1954               | 100.00                  | 2139.0                 | 100.00                      | 0.0                              | 0.00                                  | 4               | 0.0421                        | 0.9792  |
|        |                    |                         |                        |                             |                                  |                                       | 5               | 0.0354                        | 0.9824  |

**Figure S4. Distribution of Drinking Status before and after Multiple Imputation**

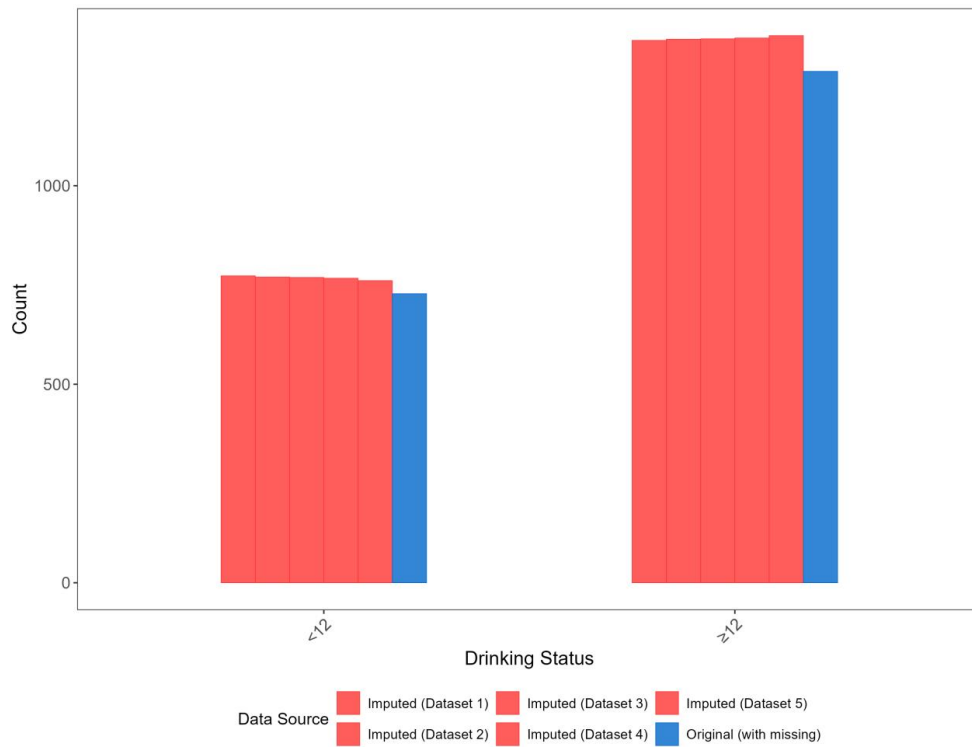

**Table S4. Comparison of Frequency, Proportion and Distribution Consistency of Drinking Frequency Categories Between Original and Multiple Imputed Datasets**

| Drink | Original Frequency | Original Proportion (%) | Mean Imputed Frequency | Mean Imputed Proportion (%) | Absolute Difference in Frequency | Relative Difference in Proportion (%) | Imputed Dataset | Chi-square Statistic $\chi^2$ | P-value |
|-------|--------------------|-------------------------|------------------------|-----------------------------|----------------------------------|---------------------------------------|-----------------|-------------------------------|---------|
| <12   | 728                | 36.11                   | 100.00                 | 35.9                        | 40.0                             | -0.57                                 | 1               | $3.4473 \times 10^{-29}$      | 1.0000  |
| ≥12   | 1288               | 63.89                   | 1371.0                 | 64.1                        | 83.0                             | 0.32                                  | 2               | $1.8905 \times 10^{-3}$       | 0.9653  |
| Total | 2016               | 100.00                  | 2139.0                 | 100.00                      | 0.0                              | 0.00                                  | 3               | $5.6037 \times 10^{-3}$       | 0.9403  |
|       |                    |                         |                        |                             |                                  |                                       | 4               | $1.8945 \times 10^{-2}$       | 0.8905  |
|       |                    |                         |                        |                             |                                  |                                       | 5               | $1.0642 \times 10^{-1}$       | 0.7443  |

**Figure S5. Cumulative incidence curves (A) and nonlinear association (B) of TyG index with DM-related mortality.**

A

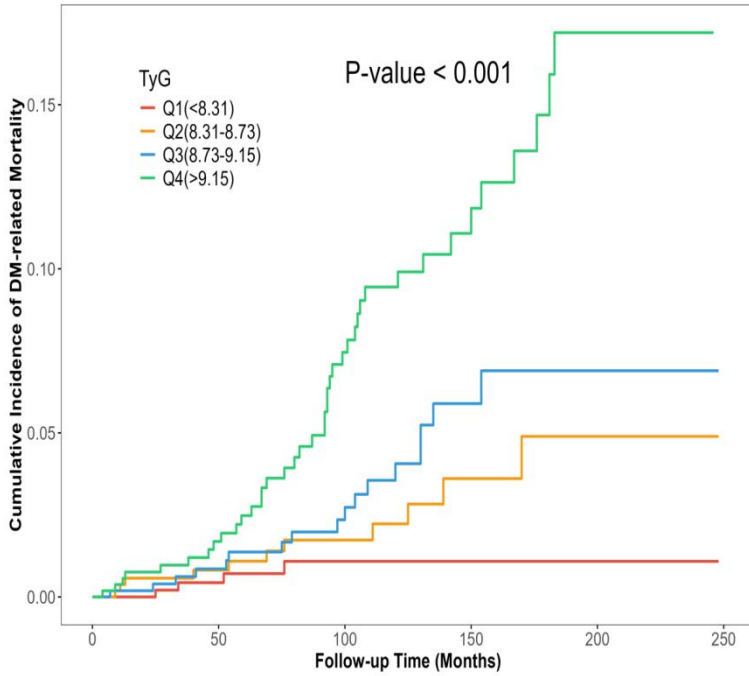

B

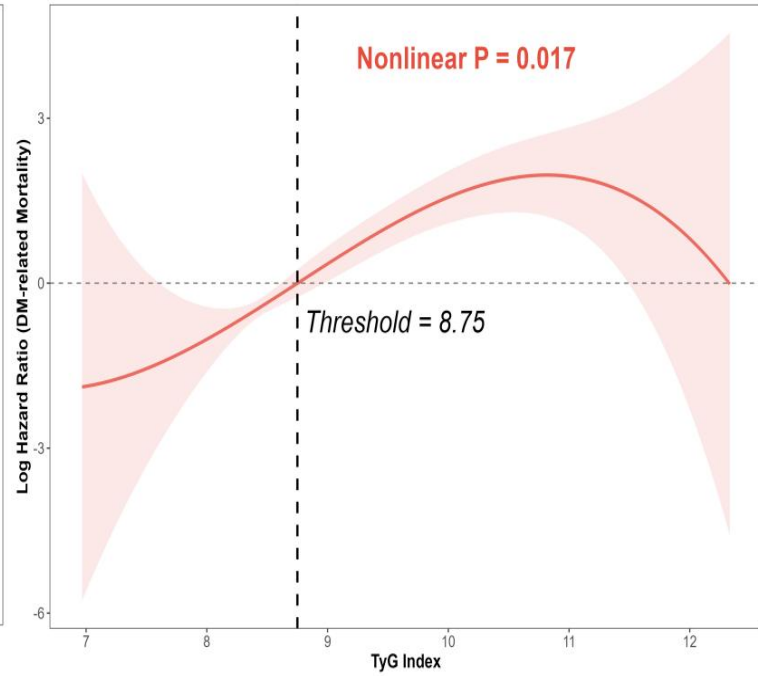

**Table S5. Threshold effect analysis of TyG on DM-related mortality.**

| Outcome              | Threshold value | <threshold value (per 1 increment) | ≥threshold value (per 1 increment) | P for log likelihood ratio test |
|----------------------|-----------------|------------------------------------|------------------------------------|---------------------------------|
| DM-related mortality | 8.75            | 0.145 (0.034, 0.619)0.0091         | 2.142 (1.541, 2.977)<0.0001        | 0.121                           |

**Table S6. Hazard Ratios (95% CI) for DM-related Mortality by TyG Index Quartiles.**

|                      | TyG                   | Q1(<8.31)             | Q2(8.31-8.73) | Q3(8.73-9.15)         | Q4(>9.15)             | P trend |
|----------------------|-----------------------|-----------------------|---------------|-----------------------|-----------------------|---------|
| Model 1 <sup>a</sup> | 3.08(2.50,3.81)<0.001 | 0.37(0.36,0.38)<0.001 | 1             | 1.18(1.01,1.39)0.038  | 2.73(1.45,5.16)0.002  | <0.001  |
| Model 2              | 2.85(2.10,3.86)<0.001 | 0.32(0.23,0.44)<0.001 | 1             | 0.87(0.63,1.21)0.41   | 1.98(0.78,5.02)0.150  | <0.001  |
| Model 3 <sup>c</sup> | 1.42(1.18,1.72)<0.001 | 0.80(0.62,1.03) 0.085 | 1             | 0.77(0.64,0.92) 0.003 | 0.81(0.41,1.61) 0.551 | <0.001  |

<sup>a</sup> Model 1: adjusted for age

<sup>b</sup> Model 2: further adjusted for sex, race, BMI, education, income-poverty ratio, alcohol use, smoking status, marital status

<sup>c</sup> Model 3: further adjusted for hypertension, dyslipidemia, CVD, DM

**Figure S6. Cumulative incidence curves (A) and nonlinear association (B) of TyG index with Hypertension-related mortality.**

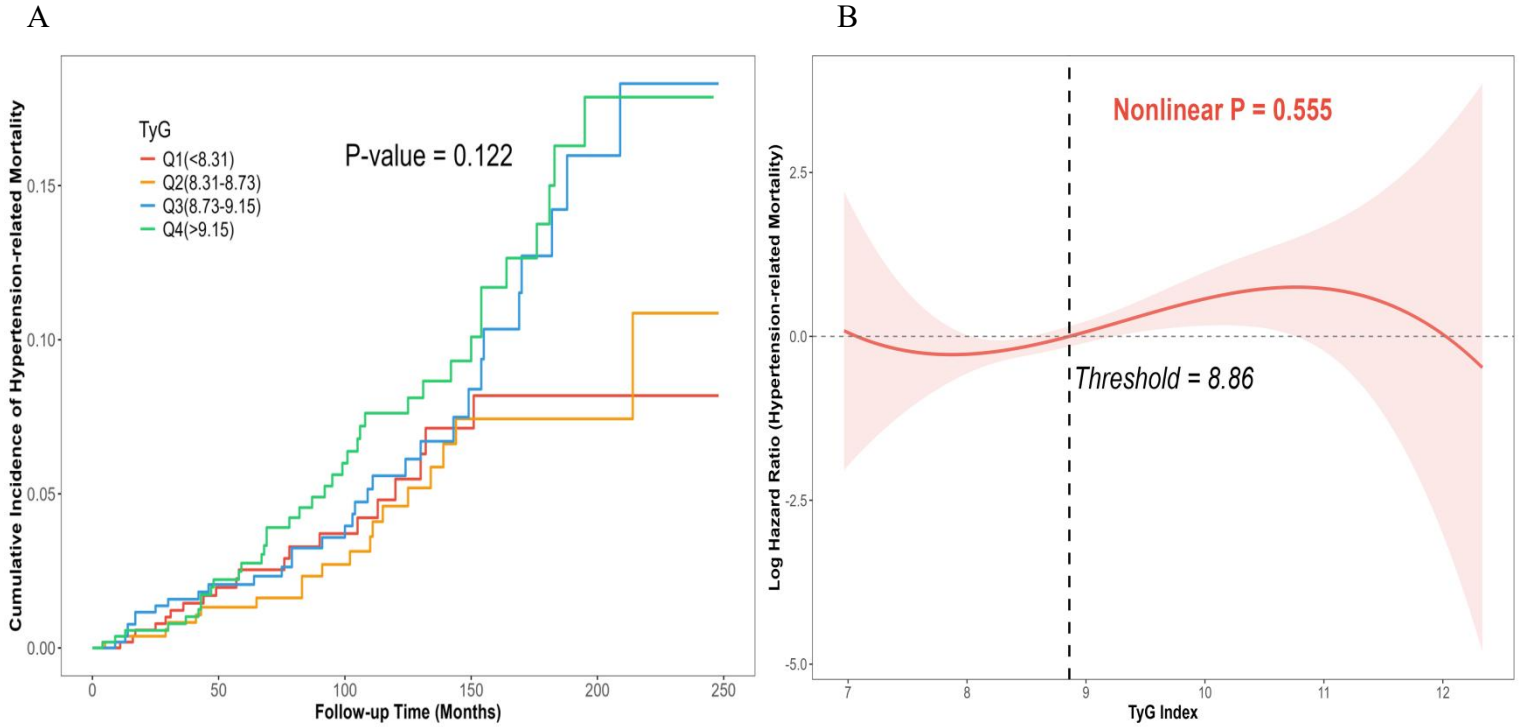

**Table S7. Threshold effect analysis of TyG on Hypertension-related mortality**

| Outcome                        | Threshold value | <threshold value (per 1 increment) | ≥threshold value (per 1 increment) | P for log likelihood ratio test |
|--------------------------------|-----------------|------------------------------------|------------------------------------|---------------------------------|
| Hypertension-related mortality | 8.86            | 0.672(0.347,1.301)0.2384           | 1.404 (0.937,2.104)0.0999          | 0.9002                          |

**Table S8. Hazard Ratios (95% CI) for Hypertension-related Mortality by TyG Index Quartiles**

|                      | TyG                  | Q1(<8.31)             | Q2(8.31-8.73) | Q3(8.73-9.15)         | Q4(>9.15)             | P trend |
|----------------------|----------------------|-----------------------|---------------|-----------------------|-----------------------|---------|
| Model 1 <sup>a</sup> | 1.45(1.14,1.85)0.002 | 2.06(1.36,3.10)0.001  | 1             | 2.41(1.92,3.03)<0.001 | 2.25(1.74,2.91)<0.001 | 0.006   |
| Model 2              | 1.30(0.86,1.98)0.210 | 2.03(1.25,3.31)0.004  | 1             | 2.34(1.65,3.33)<0.001 | 1.83(1.39,2.41)<0.001 | 0.265   |
| Model 3 <sup>c</sup> | 1.27(0.76,2.12)0.365 | 2.71(1.67,4.39)<0.001 | 1             | 3.00(1.96,4.58)<0.001 | 2.03(1.46,2.84)<0.001 | 0.793   |

<sup>a</sup> Model 1: adjusted for age

<sup>b</sup> Model 2: further adjusted for sex, race, BMI, education, income-poverty ratio, alcohol use, smoking status, marital status

<sup>c</sup> Model 3: further adjusted for hypertension, dyslipidemia, CVD, DM

**Figure S7. Kaplan-Meier curves (A) and nonlinear association (B) of TyG index with all-cause mortality among skin cancer survivors(n=613).**

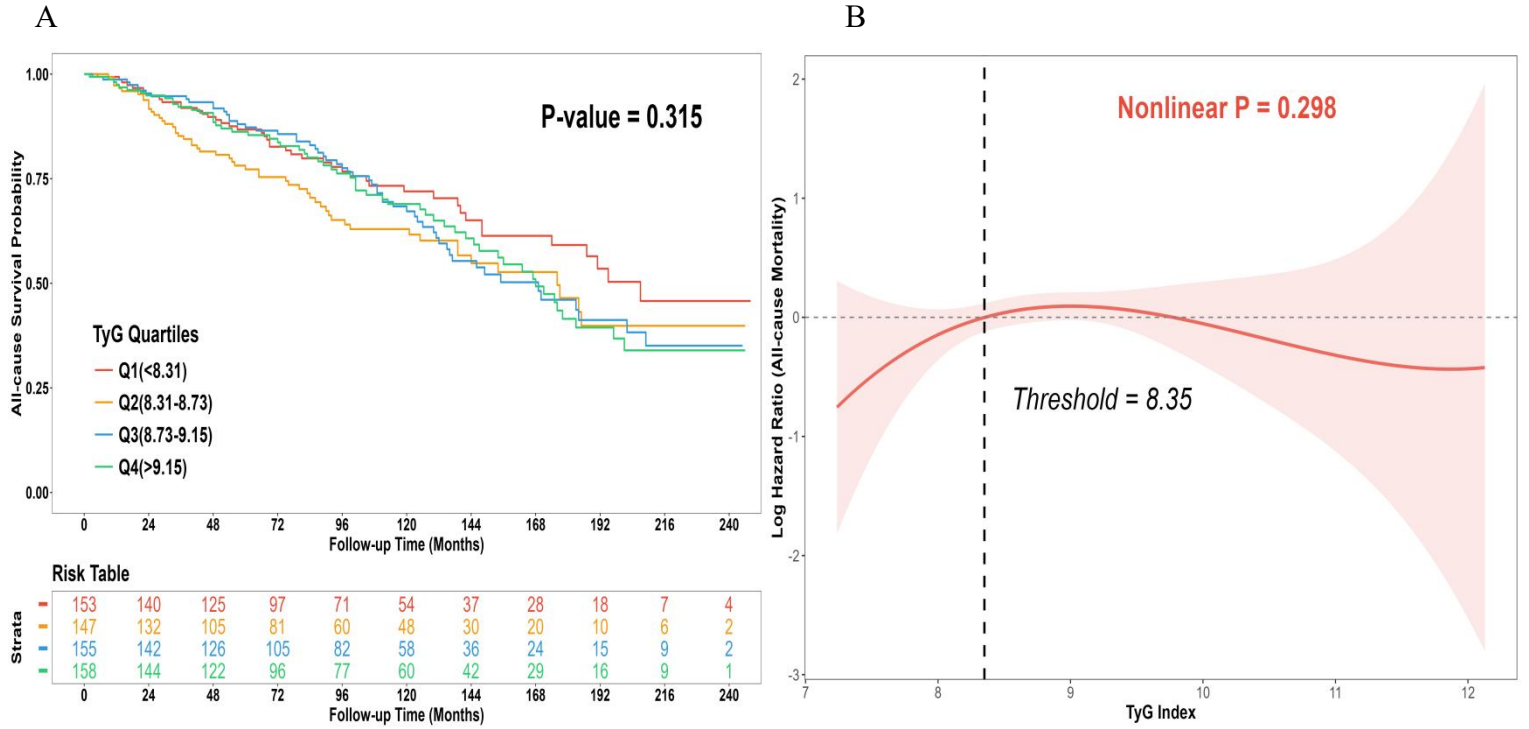

**Figure S8. Cumulative incidence curves (A) and nonlinear association (B) of TyG index with cancer-related mortality among skin cancer survivors(n=613).**

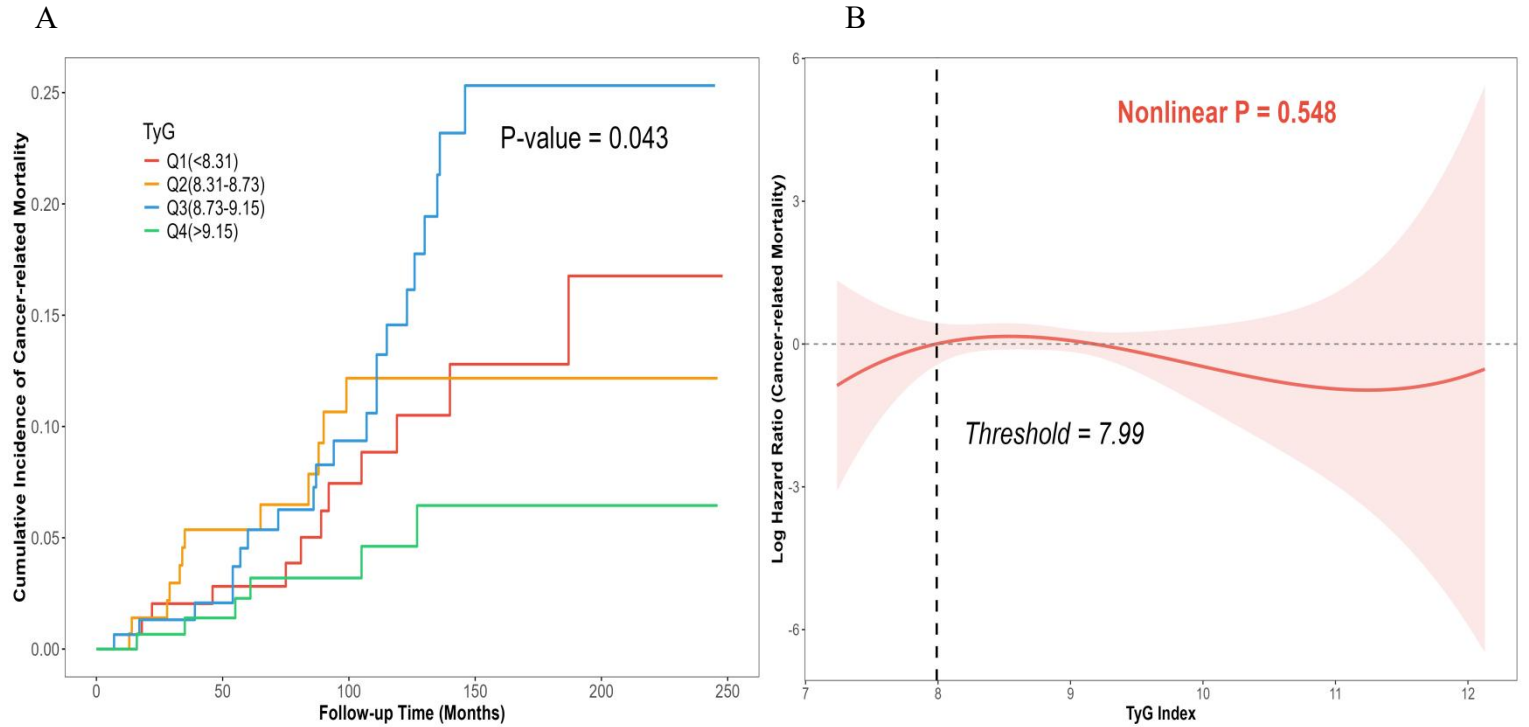

**Figure S9. Cumulative incidence curves (A) and nonlinear association (B) of TyG index with CVD-related mortality among skin cancer survivors(n=613).**

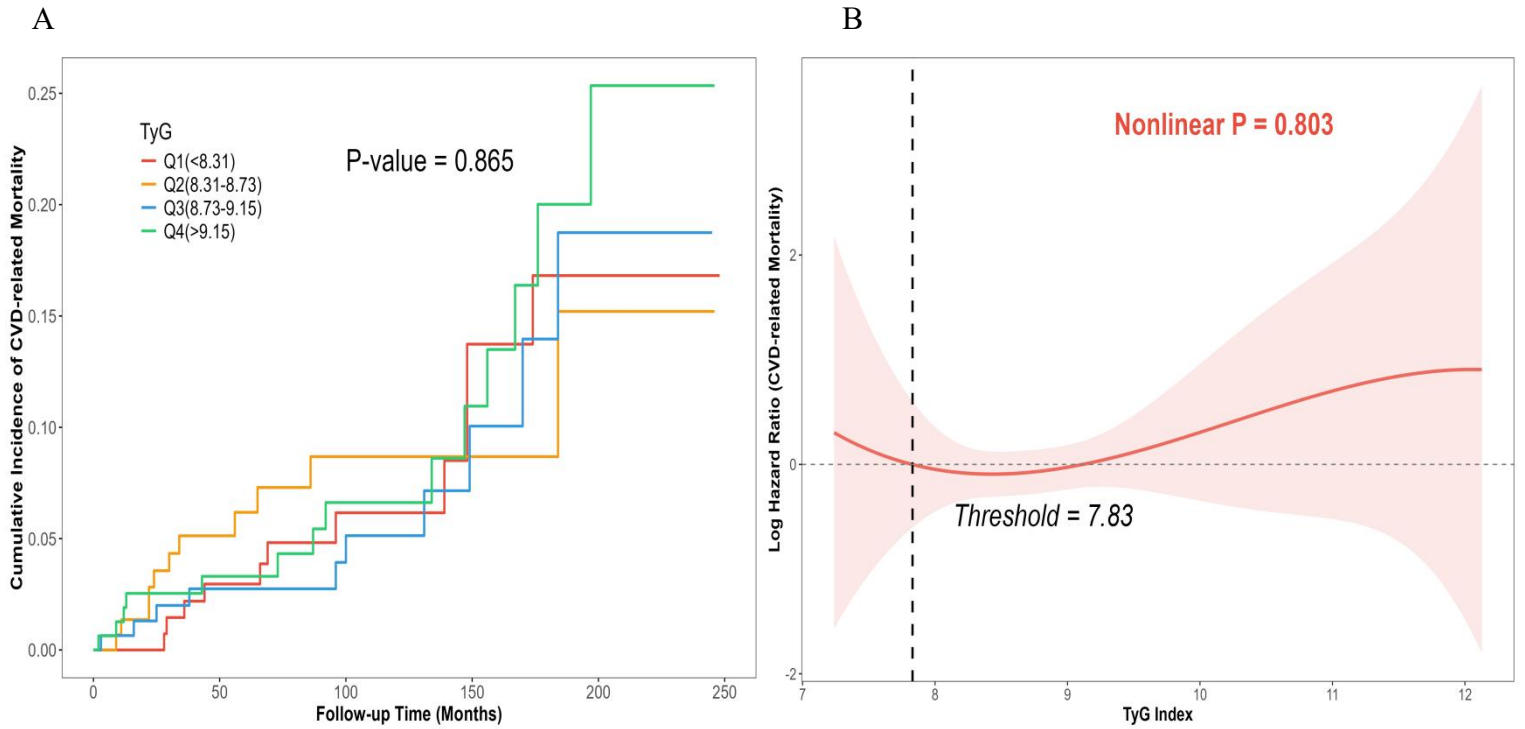

**Table S9. Threshold Effect Analysis of TyG on Cause-Specific Mortality Among Skin Cancer Survivors (n=613)**

| Outcome                  | Threshold value | <threshold value<br>(per 1 increment) | ≥threshold value<br>(per 1 increment) | P for log likelihood<br>ratio test |
|--------------------------|-----------------|---------------------------------------|---------------------------------------|------------------------------------|
| All-cause mortality      | 8.35            | 0.414(0.156,1.094)0.0753              | 0.914(0.698,1.197)0.5122              | 0.072                              |
| Cancer-related mortality | 7.99            | 0.540(0.011,25.756)0.7546             | 0.838(0.507,1.384)0.4892              | 0.6904                             |
| CVD-related mortality    | 7.83            | 0.046(0,1724.003)0.5669               | 1.147(0.739,1.782)0.54                | 0.5311                             |

**Table S10. Mortality Hazard Ratios (95% CI) by TyG Subgroups Among Skin Cancer Survivors (n=613)**

|                                 | <b>TyG</b>            | <b>Q1(&lt;8.31)</b>   | <b>Q2(8.31-8.73)</b> | <b>Q3(8.73-9.15)</b>  | <b>Q4(&gt;9.15)</b>   | <b>P trend</b> |
|---------------------------------|-----------------------|-----------------------|----------------------|-----------------------|-----------------------|----------------|
| <b>All-cause mortality</b>      |                       |                       |                      |                       |                       |                |
| Model 1 <sup>a</sup>            | 0.93(0.89,0.98)0.005  | 0.60(0.60,0.61)<0.001 | 1                    | 0.74(0.59,0.94)0.012  | 0.56(0.54,0.58)<0.001 | <0.001         |
| Model 2 <sup>b</sup>            | 0.85(0.82,0.88)<0.001 | 0.62(0.59,0.65)<0.001 | 1                    | 0.63(0.53,0.75)<0.001 | 0.4070.3890.4260.000  | <0.001         |
| Model 3 <sup>c</sup>            | 0.93(0.88,0.98)0.005  | 0.70(0.68,0.71)<0.001 | 1                    | 0.70(0.60,0.81)<0.001 | 0.45(0.38,0.52)<0.001 | <0.001         |
| <b>Cancer-related mortality</b> |                       |                       |                      |                       |                       |                |
| Model 1 <sup>a</sup>            | 0.56(0.37,0.86)0.007  | 1.08(0.84,1.40)0.536  | 1                    | 2.15(0.70,6.62)0.180  | 0.16(0.10,0.27)<0.001 | <0.001         |
| Model 2                         | 0.43(0.32,0.58)<0.001 | 0.88(0.34,2.25)0.786  | 1                    | 1.50(0.65,3.48)0.344  | 0.09(0.08,0.10)<0.001 | <0.001         |
| Model 3 <sup>c</sup>            | 0.67(0.43,1.04)0.078  | 0.49(0.07,3.34)0.470  | 1                    | 1.94(1.33,2.83)<0.001 | 0.12(0.10,0.14)<0.001 | 0.011          |
| <b>CVD-related mortality</b>    |                       |                       |                      |                       |                       |                |
| Model 1 <sup>a</sup>            | 2.00(1.58,2.52)<0.001 | 1.28(0.43,3.87)0.657  | 1                    | 0.33(0.19,0.58)<0.001 | 0.99(0.43,2.28)0.990  | 0.632          |
| Model 2 <sup>b</sup>            | 3.16(2.36,4.23)<0.001 | 1.48(0.40,5.46)0.559  | 1                    | 0.54(0.26,1.14)0.108  | 1.06(0.62,1.83)0.830  | 0.706          |
| Model 3 <sup>c</sup>            | 1.97(1.90,2.04)<0.001 | 2.70(0.20,36.50)0.454 | 1                    | 0.47(0.42,0.52)<0.001 | 0.49(0.23,1.04)0.064  | 0.056          |

<sup>a</sup> Model 1: adjusted for age

<sup>b</sup> Model 2: further adjusted for sex, race, BMI, education, income-poverty ratio, alcohol use, smoking status, marital status

<sup>c</sup> Model 3: further adjusted for hypertension, dyslipidemia, CVD, DM

**Figure S10. Kaplan-Meier curves (A) and nonlinear association (B) of TyG index with all-cause mortality among female reproductive system cancer survivors(n=587).**

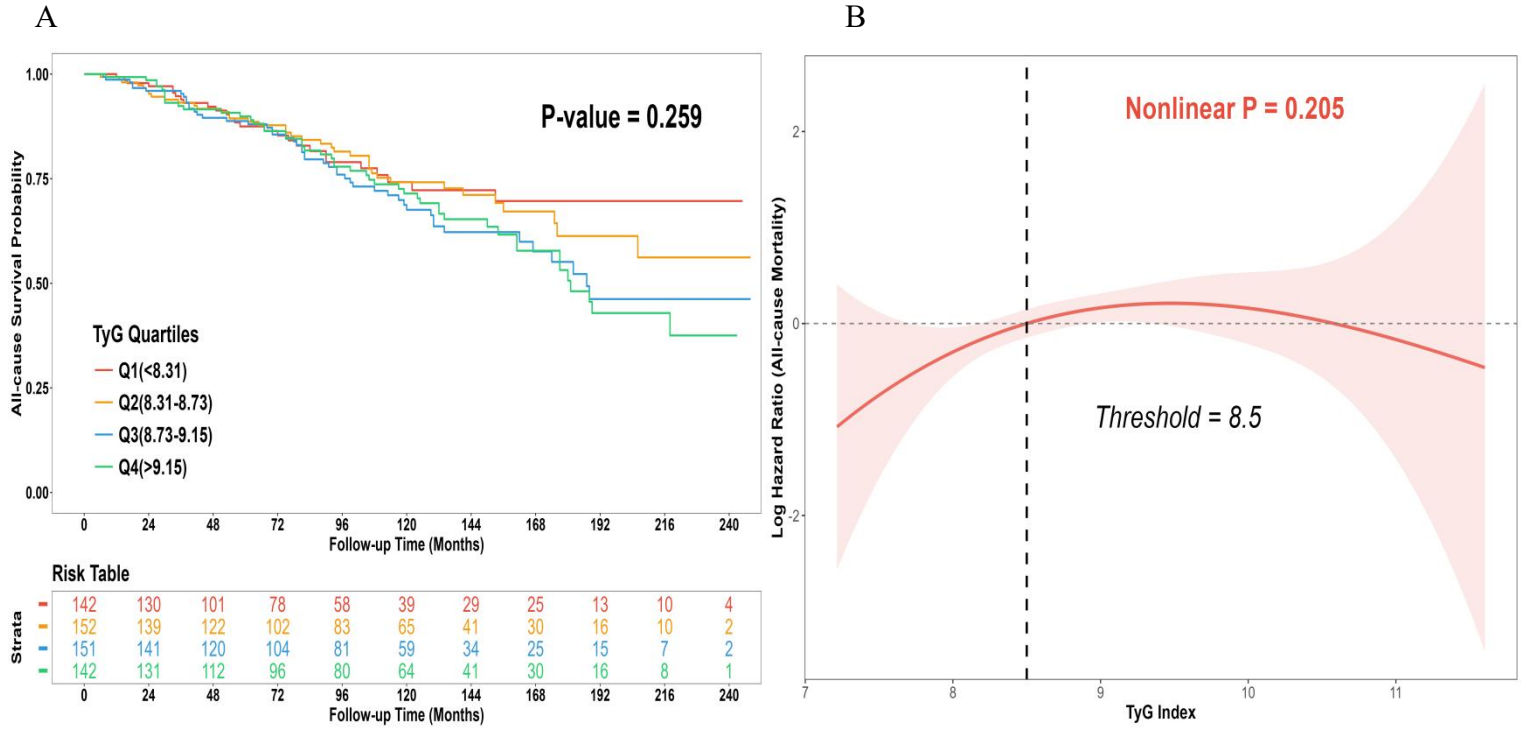

**Figure S11. Cumulative incidence curves (A) and nonlinear association (B) of TyG index with cancer-related mortality among skin cancer survivors(n=587).**

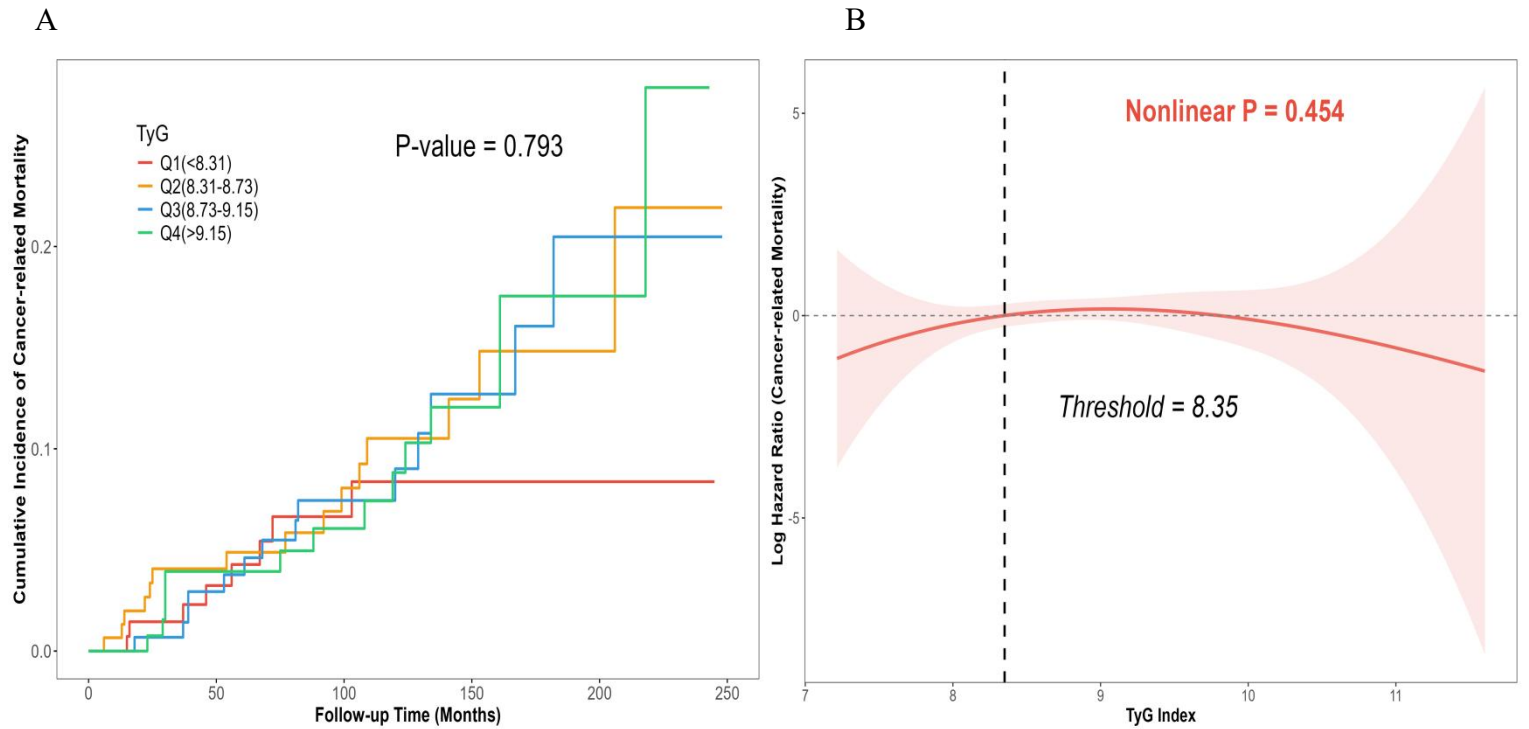

**Figure S12. Cumulative incidence curves (A) and nonlinear association (B) of TyG index with CVD-related mortality among skin cancer survivors(n=587).**

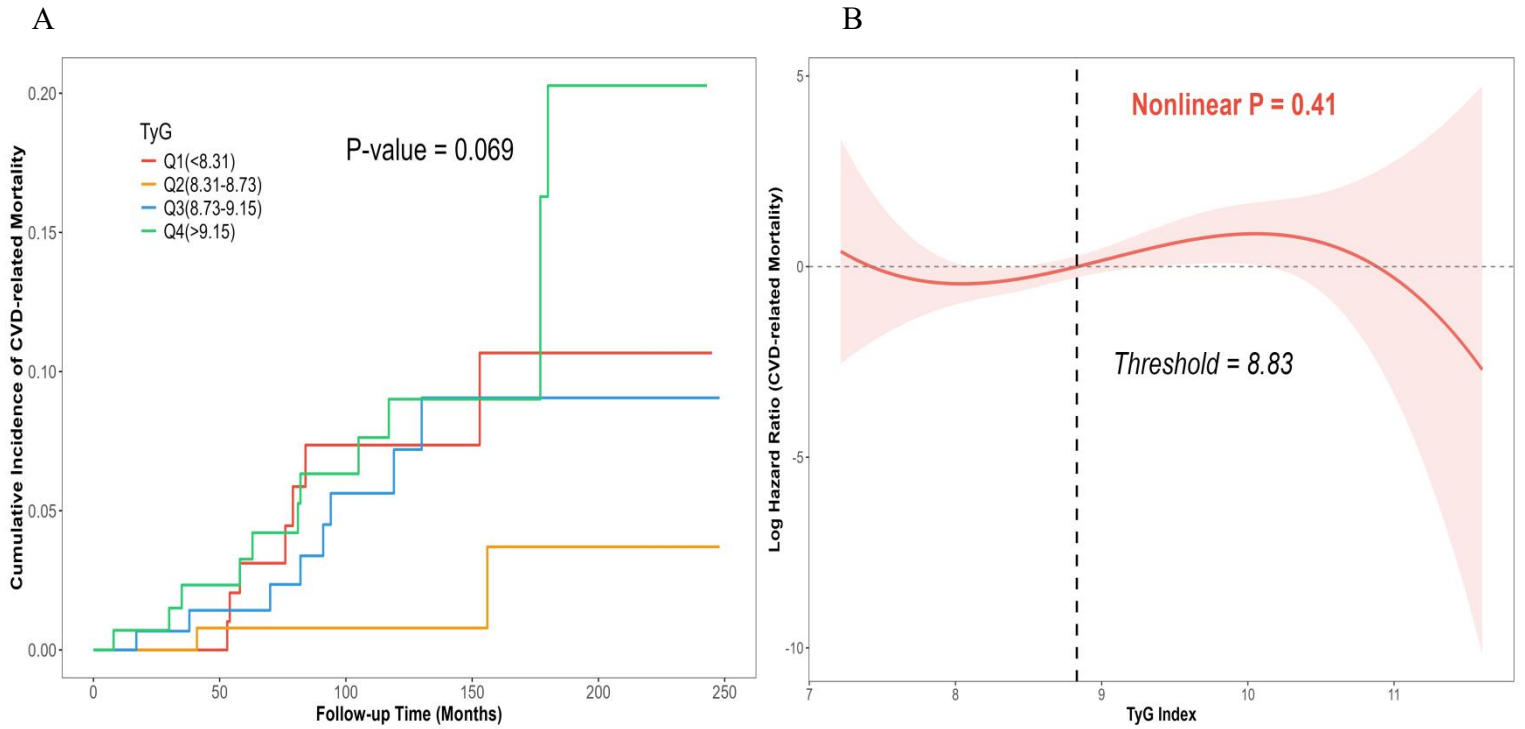

**Table S11. Threshold Effect Analysis of TyG on Cause-Specific Mortality Among Female Reproductive System Cancer Survivors (n=587)**

| Outcome                  | Threshold value | <threshold value<br>(per 1 increment) | ≥threshold value<br>(per 1 increment) | P for log likelihood<br>ratio test |
|--------------------------|-----------------|---------------------------------------|---------------------------------------|------------------------------------|
| All-cause mortality      | 8.5             | 0.435(0.178,1.063)0.0678              | 1.043(0.763,1.426)0.7931              | 0.1258                             |
| Cancer-related mortality | 8.35            | 0.494(0.076,3.196)0.4592              | 0.953(0.553,1.641)0.8622              | 0.4705                             |
| CVD-related mortality    | 8.83            | 0.784(0.218,2.825)0.7098              | 1.749(0.868,3.527)0.118               | 0.7199                             |

**Table S12. Mortality Hazard Ratios (95% CI) by TyG Subgroups Among Female Reproductive System Cancer Survivors (n=587)**

|                                 | <b>TyG</b>            | <b>Q1(&lt;8.31)</b>   | <b>Q2(8.31-8.73)</b> | <b>Q3(8.73-9.15)</b> | <b>Q4(&gt;9.15)</b>   | <b>P trend</b> |
|---------------------------------|-----------------------|-----------------------|----------------------|----------------------|-----------------------|----------------|
| <b>All-cause mortality</b>      |                       |                       |                      |                      |                       |                |
| Model 1 <sup>a</sup>            | 0.87(0.77,0.99)0.027  | 1.23(0.98,1.55)0.076  | 1                    | 1.01(0.69,1.48)0.946 | 0.71(0.60,0.84)<0.001 | <0.001         |
| Model 2 <sup>b</sup>            | 0.96(0.96,0.97)<0.001 | 1.26(0.54,2.94)0.599  | 1                    | 1.09(0.67,1.79)0.726 | 0.75(0.55,1.03)0.007  | <0.001         |
| Model 3 <sup>c</sup>            | 0.80(0.74,0.87)<0.001 | 1.49(0.64, 3.50)0.359 | 1                    | 1.03(0.78,1.36)0.861 | 0.63(0.42, 0.96)0.033 | <0.001         |
| <b>Cancer-related mortality</b> |                       |                       |                      |                      |                       |                |
| Model 1 <sup>a</sup>            | 0.44(0.30,0.65)<0.001 | 1.65(1.47,1.84)<0.001 | 1                    | 0.47(0.20,1.10)0.081 | 0.46(0.21,1.00)0.051  | 0.008          |
| Model 2                         | 0.62(0.13,2.91)0.546  | 2.75(1.50,5.05)0.001  | 1                    | 0.84(0.33,2.14)0.722 | 1.37(0.085,2.10)0.825 | 0.779          |
| Model 3 <sup>c</sup>            | 0.67(0.55,0.82)<0.001 | 2.11(0.79,5.62)0.136  | 1                    | 0.63(0.13,2.97)0.560 | 1.72(1.07,2.78)0.025  | 0.340          |
| <b>CVD-related mortality</b>    |                       |                       |                      |                      |                       |                |
| Model 1 <sup>a</sup>            | 1.25(1.13,1.40)<0.001 | 4.08(2.05,8.10)<0.001 | 1                    | 1.11(0.45,2.77)0.816 | 3.02(1.79,5.10)<0.001 | 0.521          |
| Model 2 <sup>b</sup>            | 0.68(0.61,0.76)<0.001 | 8.31(1.61,43.00)0.012 | 1                    | 1.27(0.47,3.42)0.631 | 2.31(0.65,8.21)0.197  | 0.213          |
| Model 3 <sup>c</sup>            | -                     | -                     | -                    | -                    | -                     | -              |

<sup>a</sup> Model 1: adjusted for age

<sup>b</sup> Model 2: further adjusted for sex, race, BMI, education, income-poverty ratio, alcohol use, smoking status, marital status

<sup>c</sup> Model 3: further adjusted for hypertension, dyslipidemia, CVD, DM

Note: “-” indicates that the hazard ratio could not be stably estimated due to extremely sparse events in the subgroup, hence not reported.

**Figure S13. Kaplan-Meier curves (A) and nonlinear association (B) of TyG index with all-cause mortality among urinary and reproductive system cancer survivors(n=458).**

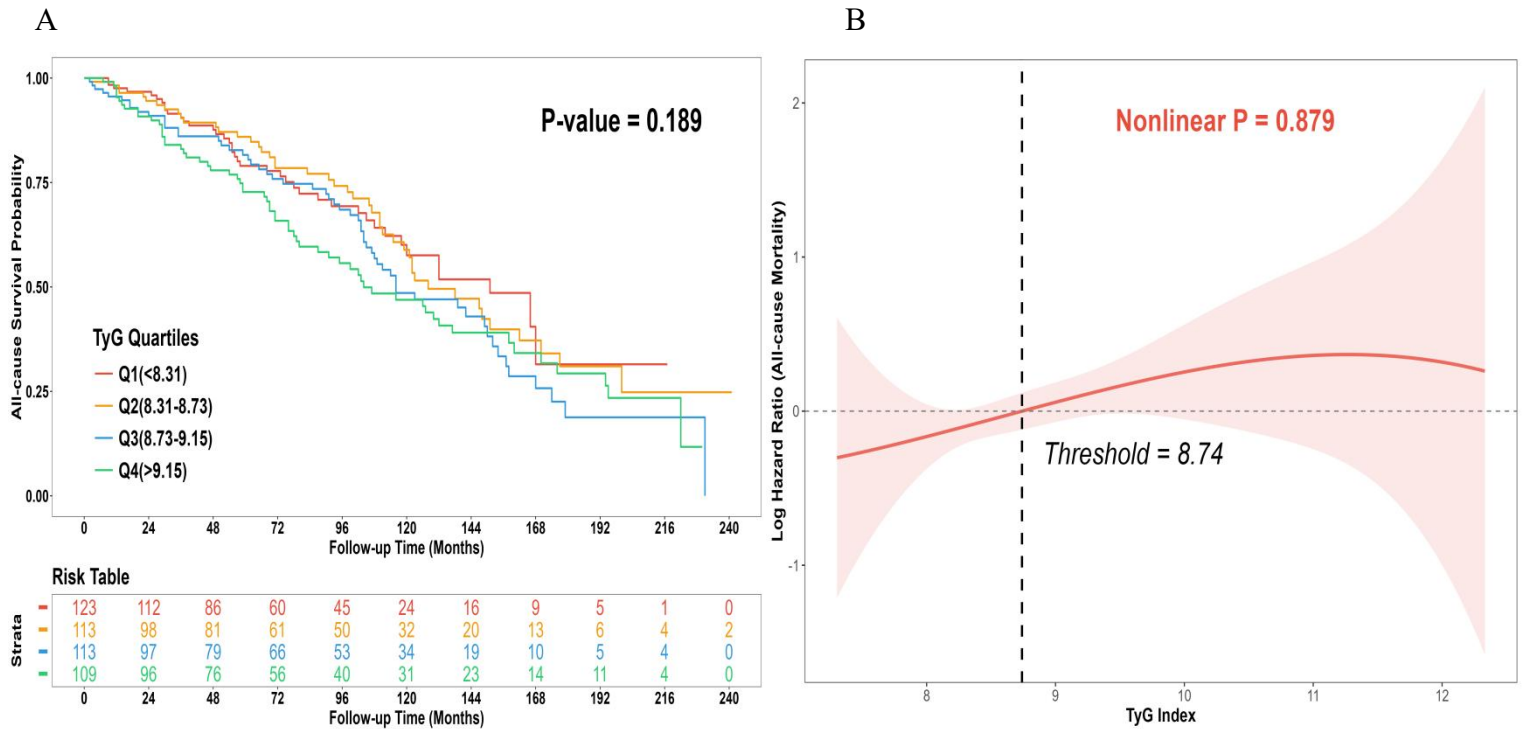

**Figure S14. Cumulative incidence curves (A) and nonlinear association (B) of TyG index with cancer-related mortality among urinary and reproductive system cancer survivors(n=458).**

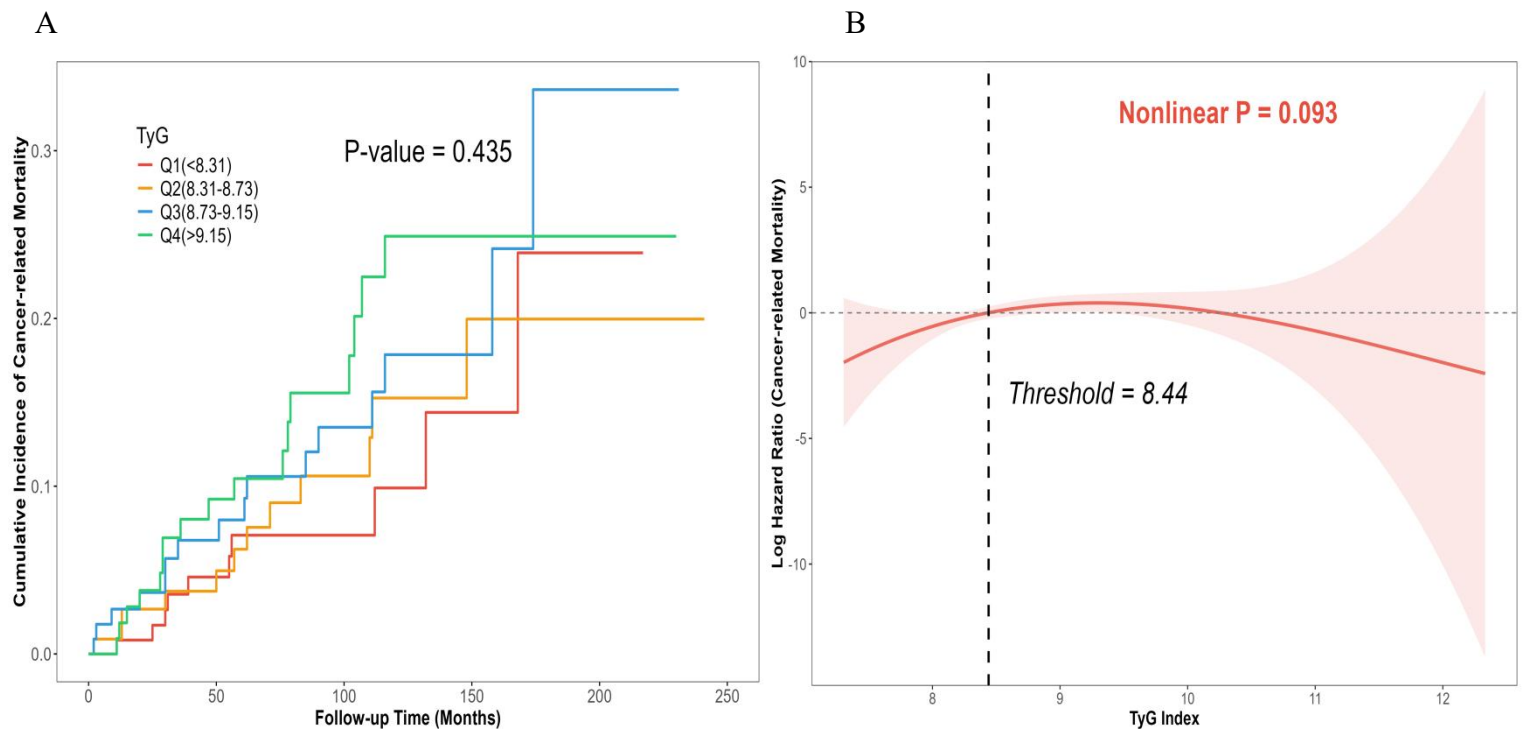

**Figure S15. Cumulative incidence curves (A) and nonlinear association (B) of TyG index with CVD-related mortality among urinary and reproductive system cancer survivors(n=458).**

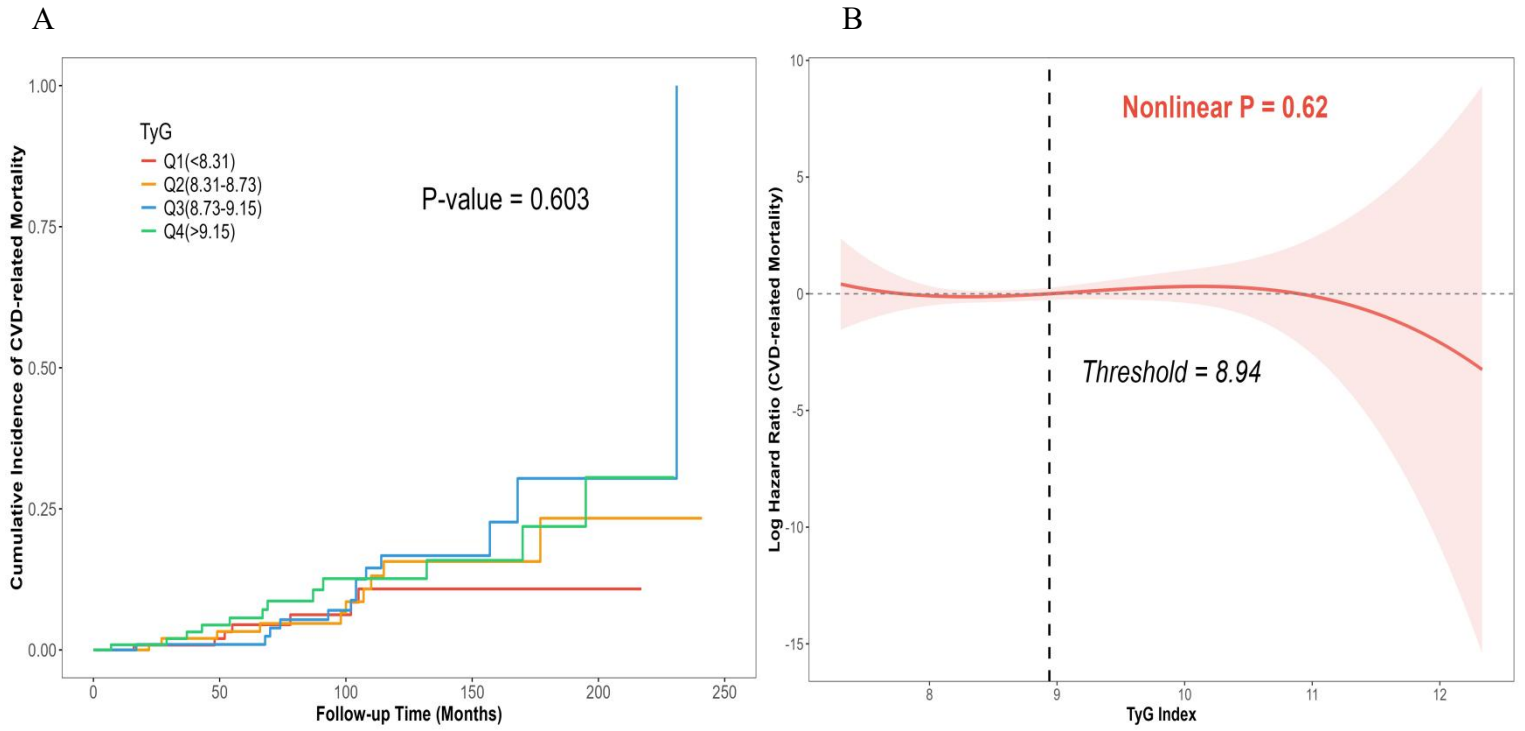

**Table S13. Threshold Effect Analysis of TyG on Cause-Specific Mortality Among Urinary and Reproductive System Cancer Survivors (n=458)**

| Outcome                  | Threshold value | <threshold value<br>(per 1 increment) | ≥threshold value<br>(per 1 increment) | P for log likelihood<br>ratio test |
|--------------------------|-----------------|---------------------------------------|---------------------------------------|------------------------------------|
| All-cause mortality      | 8.74            | 0.819(0.489,1.373)0.4487              | 1.193(0.906,1.571)0.2092              | 0.9464                             |
| Cancer-related mortality | 8.44            | 0.132(0.016,1.122)0.0637              | 0.959(0.578,1.588)0.8696              | 0.0566                             |
| CVD-related mortality    | 8.94            | 0.829(0.332,2.075)0.6893              | 1.03(0.481,2.203)0.9401               | 0.825                              |

**Table S14. Mortality Hazard Ratios (95% CI) by TyG Subgroups Among Urinary and Reproductive System Cancer Survivors (n=458).**

|                                 | <b>TyG</b>            | <b>Q1(&lt;8.31)</b>   | <b>Q2(8.31-8.73)</b> | <b>Q3(8.73-9.15)</b>  | <b>Q4(&gt;9.15)</b>   | <b>P trend</b> |
|---------------------------------|-----------------------|-----------------------|----------------------|-----------------------|-----------------------|----------------|
| <b>All-cause mortality</b>      |                       |                       |                      |                       |                       |                |
| Model 1 <sup>a</sup>            | 1.05(1.02,1.08)0.003  | 0.91(0.81,1.02)0.115  | 1                    | 0.99(0.72,1.39)0.998  | 0.92(0.85,0.99)0.020  | 0.982          |
| Model 2 <sup>b</sup>            | 0.98(0.61,1.56)0.927  | 1.14(0.86,1.53)0.363  | 1                    | 0.91(0.67,1.22)0.514  | 0.95(0.67,1.34)0.759  | 0.525          |
| Model 3 <sup>c</sup>            | 1.05(0.62,1.79)0.844  | 1.14(0.68,1.93)0.613  | 1                    | 0.99(0.77,1.30)0.982  | 1.05(0.85,1.30)0.660  | 0.828          |
| <b>Cancer-related mortality</b> |                       |                       |                      |                       |                       |                |
| Model 1 <sup>a</sup>            | 1.15(0.80,1.65)0.464  | 0.89(0.79,1.01)0.073  | 1                    | 0.81(0.49,1.33)0.404  | 1.26(0.93,1.71)0.137  | 0.478          |
| Model 2                         | 0.95(0.35,2.56)0.915  | 1.20(0.75,1.91)0.451  | 1                    | 0.44(0.27,0.72)0.001  | 1.10(0.35,3.46)0.869  | 0.754          |
| Model 3 <sup>c</sup>            | 0.95(0.28,3.28)0.938  | 1.18(0.33,4.22)0.800  | 1                    | 0.29(0.23,0.36)<0.001 | 1.48(0.28,7.77)0.645  | 0.812          |
| <b>CVD-related mortality</b>    |                       |                       |                      |                       |                       |                |
| Model 1 <sup>a</sup>            | 2.50(2.44,2.57)<0.001 | 0.52(0.31,0.86)0.012  | 1                    | 1.75(1.54,1.98)<0.001 | 2.04(1.57,2.66)<0.001 | <0.001         |
| Model 2 <sup>b</sup>            | 4.50(1.43,14.10)0.010 | 0.31(0.13,0.73)0.007  | 1                    | 4.10(2.87,5.86)<0.001 | 2.01(0.50,8.05)0.322  | 0.033          |
| Model 3 <sup>c</sup>            | 4.22(3.85,4.62)<0.001 | 0.39(0.18,0.86)0.0195 | 1                    | 3.73(1.42,9.83)0.008  | 1.37(0.60,3.14)0.455  | <0.001         |

<sup>a</sup> Model 1: adjusted for age

<sup>b</sup> Model 2: further adjusted for sex, race, BMI, education, income-poverty ratio, alcohol use, smoking status, marital status

<sup>c</sup> Model 3: further adjusted for hypertension, dyslipidemia, CVD, DM

**Figure S16. Kaplan-Meier curves (A) and nonlinear association (B) of TyG index with all-cause mortality after excluding participants who died within the first 2 years of follow-up (n=1897).**

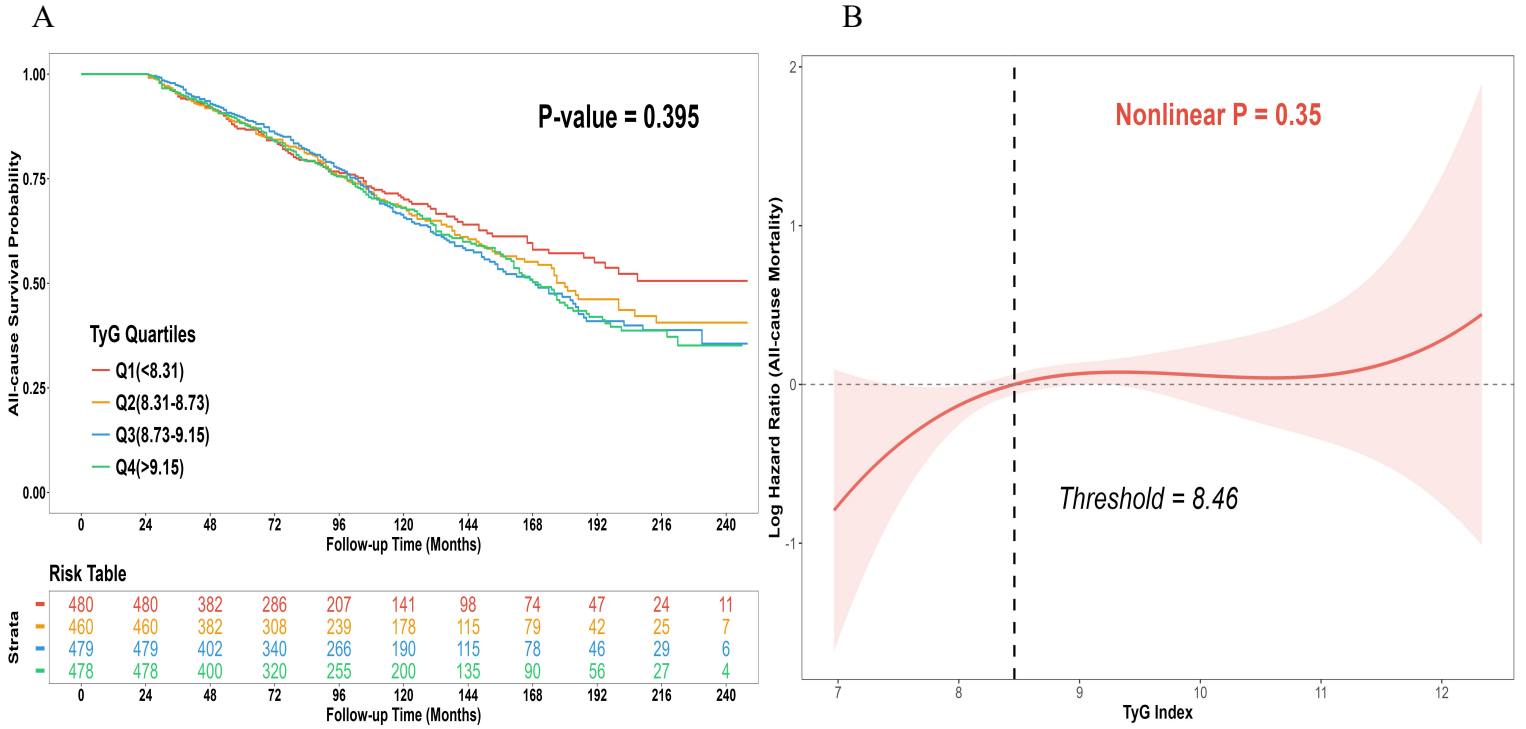

**Figure S17. Kaplan-Meier curves (A) and nonlinear association (B) of TyG index with cancer-related mortality after excluding participants who died within the first 2 years of follow-up (n=1897).**

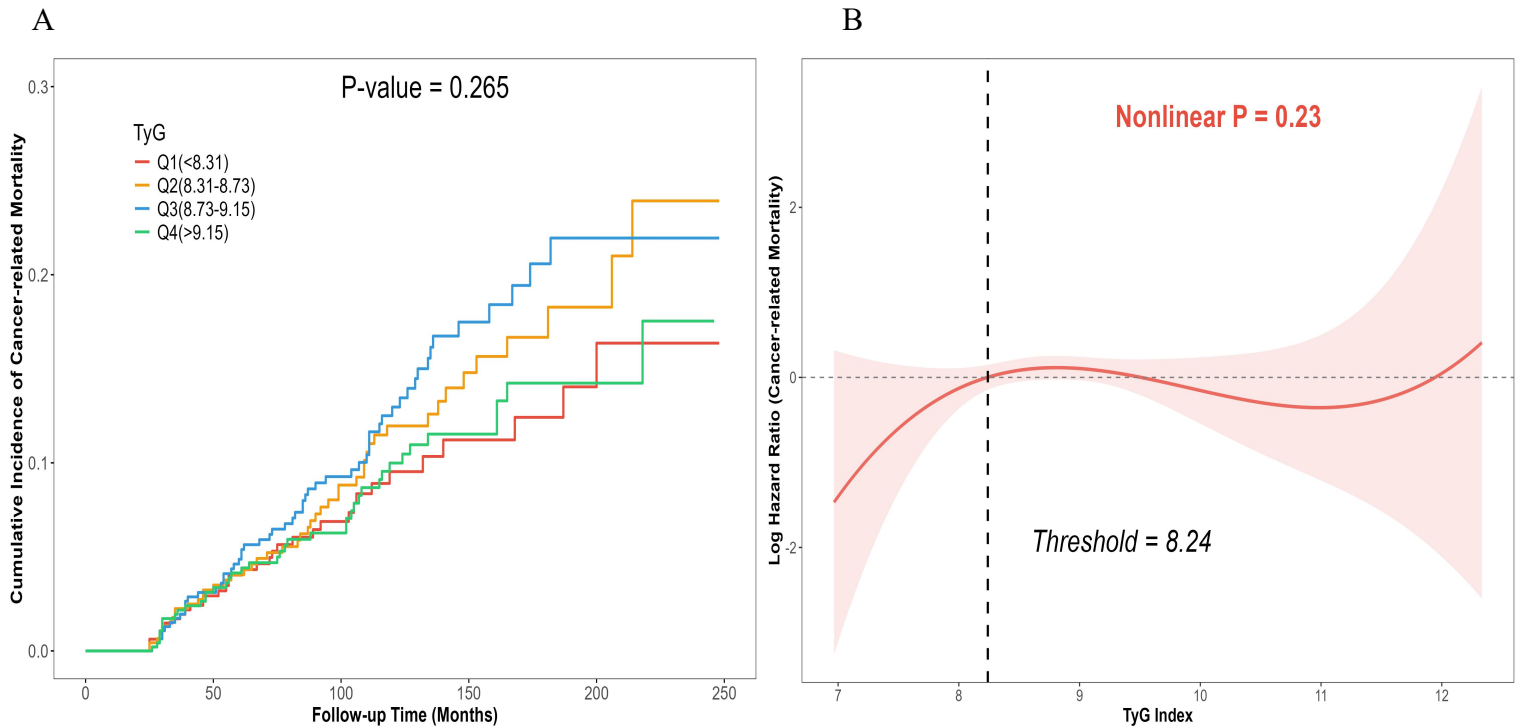

**Figure S18. Kaplan-Meier curves (A) and nonlinear association (B) of TyG index with CVD-related mortality after excluding participants who died within the first 2 years of follow-up (n=1897).**

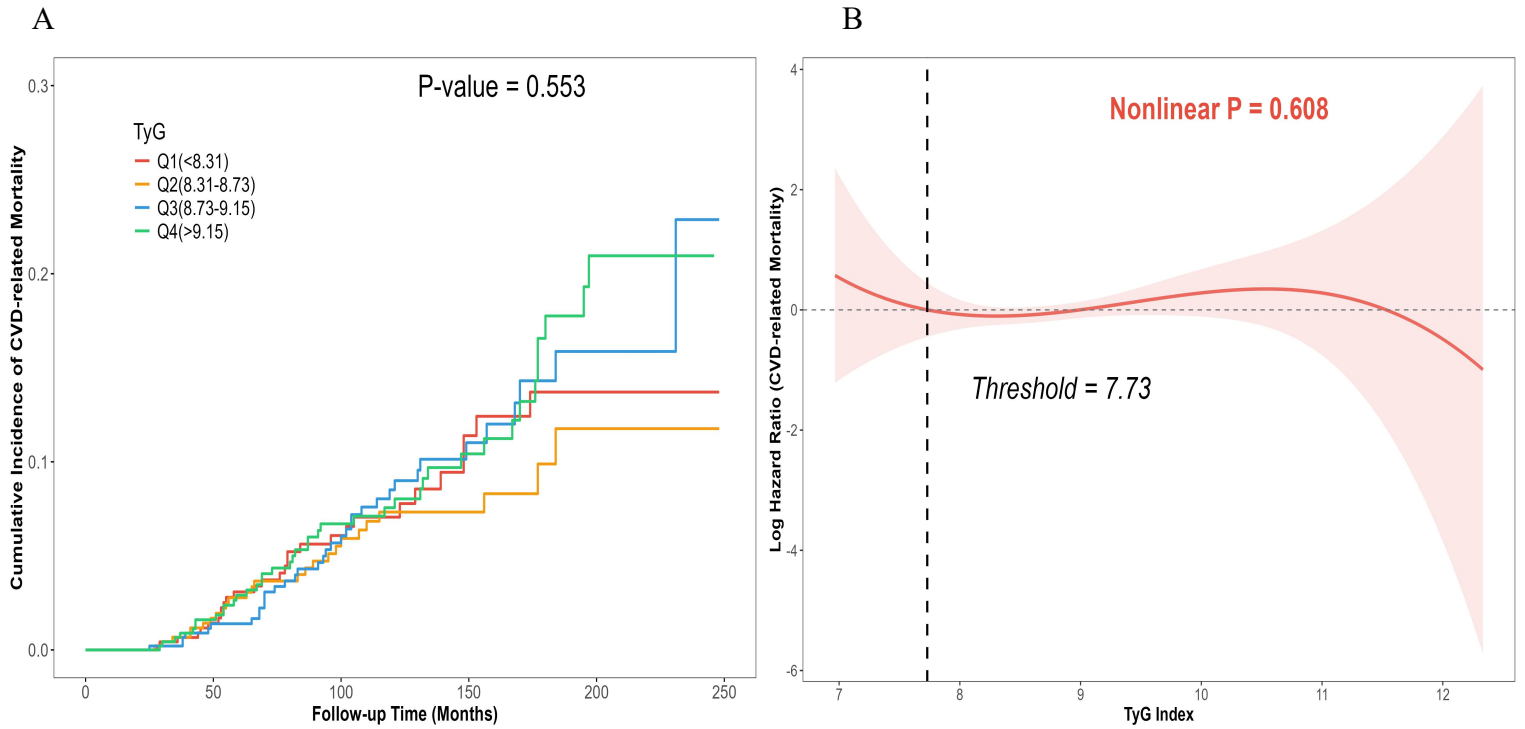

**Table S15. Threshold effect analysis of TyG on all-cause mortality after excluding participants who died within two years of follow-up (n=1897)**

| Outcome                  | Threshold value | <threshold value<br>(per 1 increment) | ≥threshold value<br>(per 1 increment) | P for log likelihood<br>ratio test |
|--------------------------|-----------------|---------------------------------------|---------------------------------------|------------------------------------|
| All-cause mortality      | 8.46            | 0.659(0.422,1.03)0.0672               | 1.031(0.88,1.208)0.704                | 0.1465                             |
| Cancer-related mortality | 8.24            | 0.416(0.112,1.544)0.190               | 0.93(0.702,1.231)0.6103               | 0.1719                             |
| CVD-related mortality    | 7.73            | 0.091(0,185.26)0.537                  | 1.114(0.852,1.456)0.4309              | 0.5073                             |

**Table S16. Mortality Hazard Ratios (95% CI) by TyG Subgroups After Excluding Participants Who Died Within 2 Years of Follow-up (n=1897)**

|                                 | <b>TyG</b>            | <b>Q1(&lt;8.31)</b>   | <b>Q2(8.31-8.73)</b> | <b>Q3(8.73-9.15)</b>  | <b>Q4(&gt;9.15)</b>   | <b>P trend</b> |
|---------------------------------|-----------------------|-----------------------|----------------------|-----------------------|-----------------------|----------------|
| <b>All-cause mortality</b>      |                       |                       |                      |                       |                       |                |
| Model 1 <sup>a</sup>            | 0.97(0.86,1.09)0.627  | 1.06(1.05,1.07)<0.001 | 1                    | 1.04(1.00,1.08)0.039  | 0.97(0.90,1.04)0.348  | 0.046          |
| Model 2 <sup>b</sup>            | 0.92(0.81,1.05)0.225  | 1.09(1.07,1.10)<0.001 | 1                    | 1.02(0.91,1.14)0.787  | 0.90(0.81,0.99)0.042  | 0.005          |
| Model 3 <sup>c</sup>            | 0.91(0.87,0.95)<0.001 | 1.13(1.06,1.21)<0.001 | 1                    | 1.01(0.93,1.10)0.855  | 0.90(0.88,0.92)<0.001 | <0.001         |
| <b>Cancer-related mortality</b> |                       |                       |                      |                       |                       |                |
| Model 1 <sup>a</sup>            | 0.79(0.49,1.29)0.347  | 1.11(0.97,1.27)0.13   | 1                    | 1.27(0.85,1.92)0.245  | 0.70(0.52,0.96)0.027  | 0.233          |
| Model 2                         | 0.83(0.46,1.50)0.546  | 1.18(1.12,1.24)<0.001 | 1                    | 1.27(0.72,2.25)0.412  | 0.79(0.46,1.36)0.396  | 0.422          |
| Model 3 <sup>c</sup>            | 0.89(0.61,1.30)0.584  | 1.13(0.89,1.43)0.326  | 1                    | 1.25(0.79,1.96)0.337  | 0.84(0.60,1.17)0.297  | 0.233          |
| <b>CVD-related mortality</b>    |                       |                       |                      |                       |                       |                |
| Model 1 <sup>a</sup>            | 1.17(1.14,1.20)<0.001 | 2.26(1.44,3.54)<0.001 | 1                    | 1.23(0.51,2.98)0.647  | 2.03(1.45,2.84)<0.001 | 0.465          |
| Model 2 <sup>b</sup>            | 1.14(0.93,1.40)0.202  | 2.01(1.18,3.42)0.01   | 1                    | 1.16(0.57,2.35)0.679  | 1.89(1.50,2.37)<0.001 | 0.003          |
| Model 3 <sup>c</sup>            | 0.89(0.85,0.92)<0.001 | 2.72(1.83,4.05)<0.001 | 1                    | 1.09 (0.44,2.69)0.851 | 1.58(0.98,2.55)0.063  | 0.135          |

<sup>a</sup> Model 1: adjusted for age

<sup>b</sup> Model 2: further adjusted for sex, race, BMI, education, income-poverty ratio, alcohol use, smoking status, marital status

<sup>c</sup> Model 3: further adjusted for hypertension, dyslipidemia, CVD, DM

**Table S17. Stratified analyses of the associations (hazard ratios, 95% CIs) between different TyG subgroups and all-cause mortality**

| TyG               | Q1(<8.31)                 | Q2(8.31-8.73)             | Q3(8.73-9.15) | Q4(>9.15)                 | P trend                    | P Interaction |
|-------------------|---------------------------|---------------------------|---------------|---------------------------|----------------------------|---------------|
| <b>Age(years)</b> |                           |                           |               |                           |                            | 0.013         |
| <60<br>(n=572)    | 0.47(0.16,1.41)<br>0.178  | 0.52(0.50,0.55)<br><0.001 | 1<br>0.047    | 0.57(0.33,0.99)<br>0.429  | 0.37(0.03,4.35)<br>0.637   |               |
| ≥60<br>(n=1567)   | 0.96(0.88,1.04)<br>0.281  | 1.04(1.03,1.05)<br><0.001 | 1<br><0.001   | 0.95(0.94,0.96)<br><0.001 | 0.86(0.823,0.89)<br><0.001 |               |
| <b>Gender</b>     |                           |                           |               |                           |                            | 0.352         |
| Male(n=1000)      | 0.91(0.85,0.98)<br>0.007  | 0.71(0.69,0.72)<br><0.001 | 1<br>0.014    | 0.66(0.47,0.92)<br><0.001 | 0.67(0.64,0.70)<br>0.007   |               |
| Female(n=1139)    | 0.88(0.73,1.04)<br>0.14   | 1.43(1.17,1.75)<br><0.001 | 1<br>0.01     | 1.26(1.05,1.52)<br><0.001 | 0.74(0.71,0.77)<br><0.001  |               |
| <b>BMI</b>        |                           |                           |               |                           |                            | 0.903         |
| <30<br>(n=1376)   | 1.08(0.94,1.25)<br>0.261  | 0.99(0.89,1.10)<br>0.856  | 1<br>0.488    | 1.10(0.84,1.45)<br>0.424  | 0.95(0.83,1.08)<br>0.912   |               |
| ≥30<br>(n=763)    | 0.80(0.79,0.80)<br><0.001 | 1.00(0.64,1.58)<br>0.996  | 1<br>0.176    | 0.67(0.37,1.20)<br>0.027  | 0.68(0.48,0.96)<br><0.001  |               |
| <b>Smoke</b>      |                           |                           |               |                           |                            | 0.034         |
| <100<br>(n=954)   | 0.97(0.78, 1.21)<br>0.778 | 0.88(0.77,1.01)<br>0.072  | 1<br>0.948    | 1.01(0.80,1.27)<br>0.009  | 0.79(0.66,0.94)<br>0.675   |               |
| ≥100<br>(n=1182)  | 0.97(0.78,1.19)<br>0.751  | 1.09(1.02,1.17)<br>0.008  | 1<br><0.001   | 0.87(0.82,0.92)<br>0.772  | 0.98(0.84,1.14)<br>0.107   |               |
| <b>Drink</b>      |                           |                           |               |                           |                            | 0.945         |
| <12<br>(n=773)    | 0.93(0.67,1.28)<br>0.644  | 1.09(0.83,1.43)<br>0.531  | 1<br>0.735    | 0.96(0.76,1.21)<br>0.089  | 0.69(0.45,1.06)<br>0.223   |               |
| ≥12<br>(n=1366)   | 0.88(0.79,0.98)<br>0.023  | 1.04(1.01,1.07)<br>0.004  | 1<br>0.510    | 1.06(0.90,1.24)<br>0.040  | 0.82(0.68,0.99)<br><0.001  |               |

Note: All models were adjusted for age, sex, race, BMI, education, income-poverty ratio, alcohol use, smoking status, marital status, hypertension, dyslipidemia, CVD, and DM.

**Table S18. Stratified analyses of the associations (hazard ratios, 95% CIs) between different TyG subgroups and cancer-related mortality**

| TyG               | Q1(<8.31)                 | Q2(8.31-8.73)             | Q3(8.73-9.15) | Q4(>9.15)                 | P trend                   | P Interaction |
|-------------------|---------------------------|---------------------------|---------------|---------------------------|---------------------------|---------------|
| <b>Age(years)</b> |                           |                           |               |                           |                           | 0.011         |
| <60<br>(n=572)    | 0.78 (0.34,1.75)<br>0.540 | 0.54(0.45,0.65)<br><0.001 | 1             | 1.44(0.34,6.11)<br>0.621  | 0.60(0.36,0.98)<br>0.042  | 0.580         |
| ≥60<br>(n=1567)   | 0.96(0.81,1.13)<br>0.600  | 0.77(0.71,0.83)<br><0.001 | 1             | 0.94(0.70,1.26)<br>0.682  | 0.66(0.62,0.70)<br><0.001 | <0.001        |
| <b>Gender</b>     |                           |                           |               |                           |                           | 0.007         |
| Male(n=1000)      | 0.93(0.80,1.10)<br>0.401  | 0.62(0.59,0.65)<br><0.001 | 1             | 0.73(0.42,1.25)<br>0.253  | 0.62(0.60,0.65)<br><0.001 | 0.478         |
| Female(n=1139)    | 0.68(0.43,1.08)<br>0.106  | 1.27(0.99,1.63)<br>0.058  | 1             | 1.11(0.48,2.56)<br>0.804  | 0.44(0.25,0.78)<br>0.005  | 0.055         |
| <b>BMI</b>        |                           |                           |               |                           |                           | <0.001        |
| <30<br>(n=1376)   | 1.56(1.46,1.67)<br><0.001 | 0.75(0.63,0.89)<br>0.001  | 1             | 1.33(0.96,1.84)<br>0.087  | 1.31(1.27,1.36)<br><0.001 | <0.001        |
| ≥30<br>(n=763)    | 0.31(0.28,0.33)<br><0.001 | 0.91(0.81,1.02)<br>0.110  | 1             | 0.30(0.29,0.31)<br><0.001 | 0.16(0.14,0.19)<br><0.001 | <0.001        |
| <b>Smoke</b>      |                           |                           |               |                           |                           | 0.254         |
| <100<br>(n=954)   | 0.98(0.64,1.50)<br>0.926  | 0.70(0.59,0.82)<br><0.001 | 1             | 0.78(0.52,1.18)<br>0.238  | 0.43(0.19,0.98)<br>0.045  | 0.442         |
| ≥100<br>(n=1182)  | 0.89(0.57,1.41)<br>0.622  | 1.12(0.91,1.39)<br>0.280  | 1             | 0.88(0.71,1.09)<br>0.235  | 0.93(0.75,1.16)<br>0.543  | 0.327         |
| <b>Drink</b>      |                           |                           |               |                           |                           | 0.883         |
| <12<br>(n=773)    | 0.90(0.28,2.90)<br>0.861  | 0.77(0.32,1.88)<br>0.571  | 1             | 0.85(0.51,1.44)<br>0.552  | 0.33(0.18,0.61)<br><0.001 | 0.335         |
| ≥12<br>(n=1366)   | 0.83(0.75,0.92)<br><0.001 | 0.95(0.87,1.04)<br>0.262  | 1             | 1.10(0.72,1.69)<br>0.662  | 0.80(0.78,0.82)<br><0.001 | 0.071         |

Note: All models were adjusted for age, sex, race, BMI, education, income-poverty ratio, alcohol use, smoking status, marital status, hypertension, dyslipidemia, CVD, and DM.

**Table S19. Stratified analyses of the associations (hazard ratios, 95% CIs) between different TyG subgroups and CVD-related mortality**

| TyG               | Q1(<8.31)                 | Q2(8.31-8.73)             | Q3(8.73-9.15) | Q4(>9.15)                 | P trend                    | P Interaction |
|-------------------|---------------------------|---------------------------|---------------|---------------------------|----------------------------|---------------|
| <b>Age(years)</b> |                           |                           |               |                           |                            |               |
| <60<br>(n=572)    | -                         | -                         | -             | -                         | -                          | -             |
| ≥60<br>(n=1567)   | 1.28(1.08,1.51)<br>0.004  | 1.87(1.28,2.72)<br>0.001  | 1<br>0.524    | 1.12(0.80,1.56)<br>0.524  | 1.77(1.59,1.97)<br><0.001  | 0.226         |
| <b>Gender</b>     |                           |                           |               |                           |                            |               |
| Male(n=1000)      | 1.17(0.99,1.38)<br>0.071  | 1.63(1.50,1.76)<br><0.001 | 1             | 0.88(0.65,1.20)<br>0.410  | 0.82(0.31,2.11)<br>0.674   | 0.188         |
| Female(n=1139)    | 0.99(0.83,1.17)<br>0.892  | 4.03(2.16,7.51)<br><0.001 | 1             | 1.00(0.53,1.90)<br>0.992  | 2.57(1.63,4.03)<br><0.001  | 0.060         |
| <b>BMI</b>        |                           |                           |               |                           |                            |               |
| <30<br>(n=1376)   | 0.68(0.61,0.77)<br><0.001 | 1.73(1.37,2.20)<br><0.001 | 1             | 1.09(1.06,1.12)<br><0.001 | 0.65(0.48,0.88)<br>0.005   | <0.001        |
| ≥30<br>(n=763)    | 1.93(1.51,2.46)<br><0.001 | 1.34(0.26,6.79)<br>0.727  | 1             | 2.72(0.81, 9.17)<br>0.107 | 5.42(2.64,11.10)<br><0.001 | <0.001        |
| <b>Smoke</b>      |                           |                           |               |                           |                            |               |
| <100<br>(n=954)   | 1.59(0.69,3.66)<br>0.277  | 2.02(0.90,4.52)<br>0.087  | 1             | 1.71(0.96,3.07)<br>0.071  | 2.72(1.81,4.07)<br><0.001  | 0.562         |
| ≥100<br>(n=1182)  | 0.87(0.62,1.23)<br>0.431  | 1.08(0.49,2.41)<br>0.845  | 1             | 0.65(0.42,0.99)<br>0.047  | 0.80(0.49,1.31)<br>0.378   | <0.001        |
| <b>Drink</b>      |                           |                           |               |                           |                            |               |
| <12<br>(n=773)    | 0.84(0.79,0.90)<br><0.001 | 1.34(0.82,2.20)<br>0.240  | 1             | 1.27(0.95,1.70)<br>0.105  | 1.06(0.81,1.39)<br>0.654   | 0.091         |
| ≥12<br>(n=1366)   | 1.20(0.97,1.48)<br>0.096  | 1.72(1.38,2.14)<br><0.001 | 1             | 1.52(1.45,1.59)<br><0.001 | 1.41(1.02,1.95)<br>0.040   | 0.640         |

Note: All models were adjusted for age, sex, race, BMI, education, income-poverty ratio, alcohol use, smoking status, marital status, hypertension, dyslipidemia, CVD, and DM.

“-” indicates that the hazard ratio could not be stably estimated due to extremely sparse events in the subgroup, hence not reported.
